# Supplementary material for: A Novel Superpixel Approach to the Tumoral Microenvironment in Colorectal Cancer
Source: PubMed Central journal article supplement — J Pathol Inform. 2022 Feb 5;13:100009. doi: 10.1016/j.jpi.2022.100009 (PMC8855322; doi:10.1016/j.jpi.2022.100009), 2022-02-05
Supplement: mmc1.pdf [file mmc1.pdf]

**1 – Please send one paper and include all source files for the latest version of the submitted paper**

**Done**

**2 – Please include any notes for management of the APCs**

**APC has already been paid and author should not be invoiced)**

**3 – Please include Accepted and Submission dates**

**04-21-2021**

**4 – If you have a manuscript number, please include in the subject line for ease of tracking**

**JPI 22\_21**

**5 – Please include a title page with the list of authors affiliations and the corresponding author details**

**A Novel Superpixel Approach to the Tumoral Microenvironment in Colorectal Cancer**

*Sean M. Hacking<sup>1,2\*</sup>, MB,BCh,BAO; Dongling Wu<sup>1\*</sup>, MD; Claudine Alexis<sup>1</sup>, MBA; and Mansoor Nasim<sup>1,3</sup>, MD, PhD*

1. Department of Pathology and Laboratory Medicine, Donald and Barbara Zucker School of Medicine at Hofstra/Northwell, 2200 Northern Blvd, Suite 104, Greenvale, NY, 11548, USA.
2. Department of Pathology and Laboratory Medicine, Rhode Island Hospital and Lifespan Medical Center, Warren Alpert Medical School of Brown University, 593 Eddy St, APC 12, Providence, RI, 02903, USA.
3. Department of Pathology, Renaissance School of Medicine, Stony Brook University, 100 Nicolls Rd, Stony Brook, NY, 11794, USA.

**Key Words:** Superpixel Segmentation; Tumoral Microenvironment; Colorectal Cancer; Frontiers Beyond the Microscope; Stromal Differentiation

Correspondence to: sean\_hacking@brown.edu

\*These authors contributed equally to this body of work.
